# Supplementary material for: A new metal complex-templated silver iodobismuthate exhibiting photocurrent response and photocatalytic property
Source: Royal Society of Chemistry journal article supplement (doi:10.1039/d2dt01682f), 2022-01-01
Supplement: d2dt01682f1.pdf [file d2dt01682f1.pdf]

Electronic Supporting Information (ESI) for

## A new metal complex-templated silver iodobismuthate exhibiting photocurrent response and photocatalytic property

Bo Zhang,<sup>\*ab</sup> Jun Li,<sup>\*ab</sup> Yan Yang,<sup>ab</sup> Wen-Hao Wang,<sup>a</sup> Hong-Yao Shen,<sup>a</sup> and Ya-Nan Shao<sup>a</sup>

<sup>a</sup> School of Chemistry and Chemical Engineering, Liaocheng University, Liaocheng 252059

<sup>b</sup> State Key Laboratory of Structural Chemistry, Fujian Institute of Research on the Structure of Matter, Chinese Academy of Sciences, Fuzhou 350002

*E-mail: bzhang@lcu.edu.cn; junli@lcu.edu.cn*

### 1. More structural details

**Table S1** Selected bond lengths (Å) and bond angles (°) for compound **1**.

|                     |            |                      |            |
|---------------------|------------|----------------------|------------|
| Bi(1)–I(1)#1        | 3.0636(5)  | I(2)–I(4)#6          | 0.522(18)  |
| Bi(1)–I(1)#2        | 3.0636(5)  | I(2)–I(3)            | 2.85(2)    |
| Bi(1)–I(1)#3        | 3.0637(5)  | I(3)–I(3)#6          | 0.39(3)    |
| Bi(1)–I(1)#4        | 3.0638(5)  | I(3)–I(4)#6          | 2.53(3)    |
| Bi(1)–I(1)#5        | 3.0637(5)  | I(3)–I(4)            | 2.82(3)    |
| Bi(1)–I(1)          | 3.0637(5)  | Zn(1)–N(1)#7         | 2.128(5)   |
| Ag(1)–I(2B)         | 2.653(12)  | Zn(1)–N(1)           | 2.128(5)   |
| Ag(1)–I(1)          | 2.814(2)   | Zn(1)–N(1)#8         | 2.128(5)   |
| Ag(1)–I(2)          | 2.958(11)  | Zn(1)–N(2)#8         | 2.150(5)   |
| Ag(1)–I(1)#3        | 3.069(2)   | Zn(1)–N(2)           | 2.150(5)   |
| Ag(1)–I(1)#2        | 3.133(2)   | Zn(1)–N(2)#7         | 2.150(5)   |
| I(1)#1–Bi(1)–I(1)#2 | 180.0      | Ag(1)#2–I(1)–Ag(1)#3 | 135.16(7)  |
| I(1)#1–Bi(1)–I(1)#3 | 89.630(14) | I(1)#2–Bi(1)–I(1)#5  | 89.631(14) |
| I(1)#2–Bi(1)–I(1)#3 | 90.370(14) | I(1)#3–Bi(1)–I(1)#5  | 180.0      |
| I(1)#1–Bi(1)–I(1)#4 | 89.631(14) | I(1)#4–Bi(1)–I(1)#5  | 89.633(14) |
| I(1)#2–Bi(1)–I(1)#4 | 90.367(14) | I(1)#1–Bi(1)–I(1)    | 90.368(14) |
| I(1)#3–Bi(1)–I(1)#4 | 90.365(14) | I(1)#2–Bi(1)–I(1)    | 89.634(14) |
| I(1)#1–Bi(1)–I(1)#5 | 90.370(14) | I(1)#3–Bi(1)–I(1)    | 89.634(14) |
| I(1)#4–Bi(1)–I(1)   | 180.0      | N(1)#7–Zn(1)–N(1)    | 95.6(2)    |
| I(1)#5–Bi(1)–I(1)   | 90.368(14) | N(1)#7–Zn(1)–N(1)#8  | 95.6(2)    |
| I(2B)–Ag(1)–I(1)    | 124.4(3)   | N(1)–Zn(1)–N(1)#8    | 95.6(2)    |
| I(1)–Ag(1)–I(2)     | 120.4(2)   | N(1)#7–Zn(1)–N(2)#8  | 167.65(19) |
| I(2B)–Ag(1)–I(1)#3  | 123.0(3)   | N(1)–Zn(1)–N(2)#8    | 94.82(19)  |
| I(1)–Ag(1)–I(1)#3   | 94.37(6)   | N(1)#8–Zn(1)–N(2)#8  | 76.8(2)    |
| I(2)–Ag(1)–I(1)#3   | 124.8(3)   | N(1)#7–Zn(1)–N(2)    | 94.8(2)    |

|                     |          |                     |            |
|---------------------|----------|---------------------|------------|
| I(1)–Ag(1)–I(1)#2   | 92.99(6) | N(1)–Zn(1)–N(2)     | 76.8(2)    |
| I(2)–Ag(1)–I(1)#2   | 126.1(3) | N(1)#8–Zn(1)–N(2)   | 167.65(19) |
| I(1)#3–Ag(1)–I(1)#2 | 88.98(5) | N(2)#8–Zn(1)–N(2)   | 94.02(19)  |
| Ag(1)–I(1)–Bi(1)    | 71.53(4) | N(1)#7–Zn(1)–N(2)#7 | 76.8(2)    |
| Ag(1)–I(1)–Ag(1)#2  | 80.51(4) | N(1)–Zn(1)–N(2)#7   | 167.65(19) |
| Bi(1)–I(1)–Ag(1)#2  | 68.26(4) | N(1)#8–Zn(1)–N(2)#7 | 94.83(19)  |
| Ag(1)–I(1)–Ag(1)#3  | 79.40(4) | N(2)#8–Zn(1)–N(2)#7 | 94.02(19)  |
| Bi(1)–I(1)–Ag(1)#3  | 67.45(4) | N(2)–Zn(1)–N(2)#7   | 94.02(19)  |

Symmetry transformations used to generate equivalent atoms: #1  $-x+y+1, -x+1, z$ ; #2  $x-y+1/3, x-1/3, -z+5/3$ ; #3  $y+1/3, -x+y+2/3, -z+5/3$ ; #4  $-x+4/3, -y+2/3, -z+5/3$ ; #5  $-y+1, x-y, z$ ; #6  $-x+4/3, -y+5/3, -z+5/3$ ; #7  $-x+y+1, -x+2, z$ ; #8  $-y+2, x-y+1, z$ .

**Table S2** Hydrogen bonds (Å) and angles (°) for compound **1**.

| C–H $\cdots$ I              | d(C–H) | d(H $\cdots$ I) | d(C $\cdots$ I) | $\angle$ (CHI) |
|-----------------------------|--------|-----------------|-----------------|----------------|
| C(4)–H(4) $\cdots$ I(1)#3   | 0.93   | 3.14            | 3.857(7)        | 135.9          |
| C(7)–H(7) $\cdots$ I(1)     | 0.93   | 3.33            | 3.983(7)        | 129.6          |
| C(2)–H(2) $\cdots$ I(2B)#9  | 0.93   | 3.15            | 3.782(15)       | 126.6          |
| C(9)–H(9) $\cdots$ I(2B)#10 | 0.93   | 3.31            | 3.976(14)       | 130.4          |

Symmetry transformations used to generate equivalent atoms: #3  $y+1/3, -x+y+2/3, -z+5/3$ ; #9  $-x+5/3, -y+4/3, -z+4/3$ ; #10  $-x+y+2/3, -x+4/3, z+1/3$ .

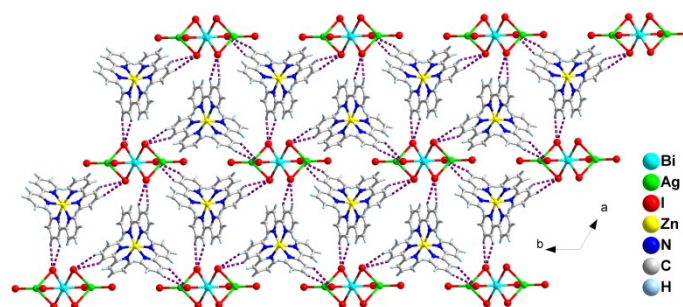

**Fig. S1** View of the discrete  $[\text{Ag}_2\text{BiI}_6(\text{I})]_n^{2n-}$  anions along the  $c$  axis; dashed lines show the C–H $\cdots$ I interactions.

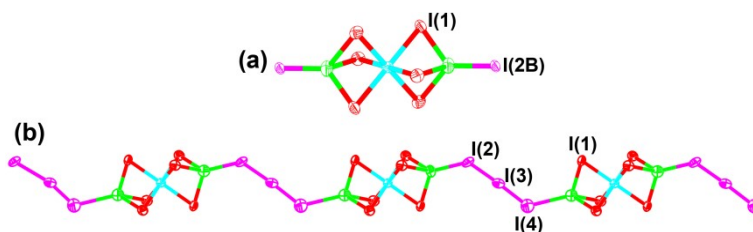

**Fig. S2** (a) The discrete  $[\text{Ag}_2\text{BiI}_6(\text{I})]_n^{2n-}$  moiety. (b) The 1D  $[\text{Ag}_2\text{BiI}_6(\text{I}_3)]_n^{2n-}$  chain. Thermal ellipsoids are at 50% probability.

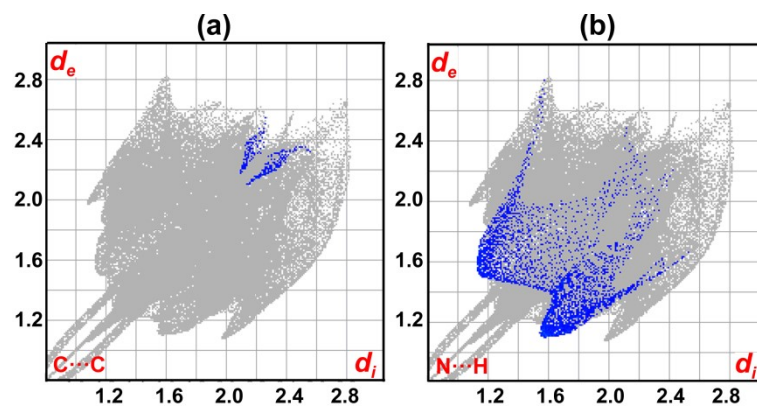

Fig. S3 (a) The C...C interaction. (b) The N...H interaction.

## 2. Physical measurements

### 2a). EDX

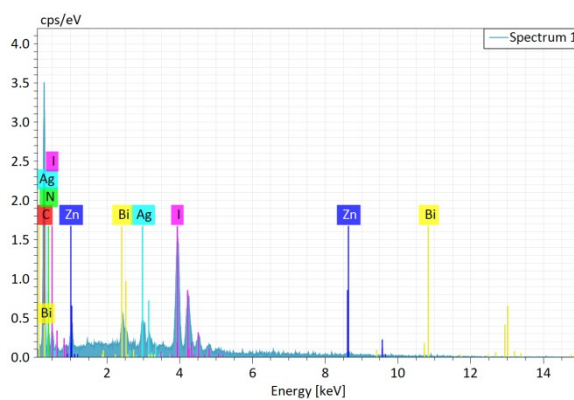

Fig. S4 EDX spectrum of compound 1.

### 2b). TGA

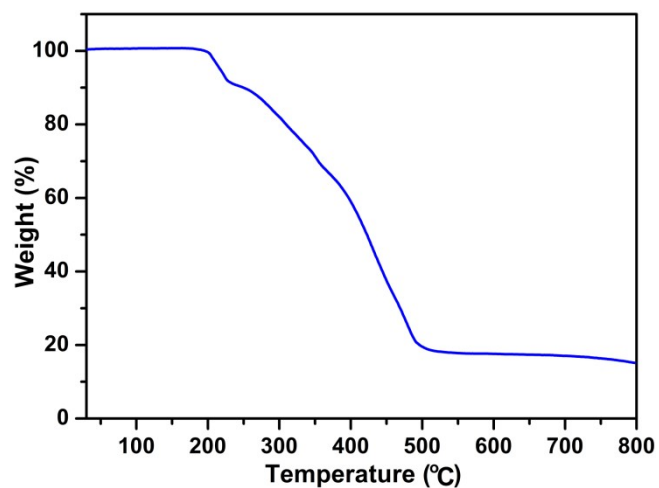

Fig. S5 The TGA curve of compound 1.

### 2c). UV-vis

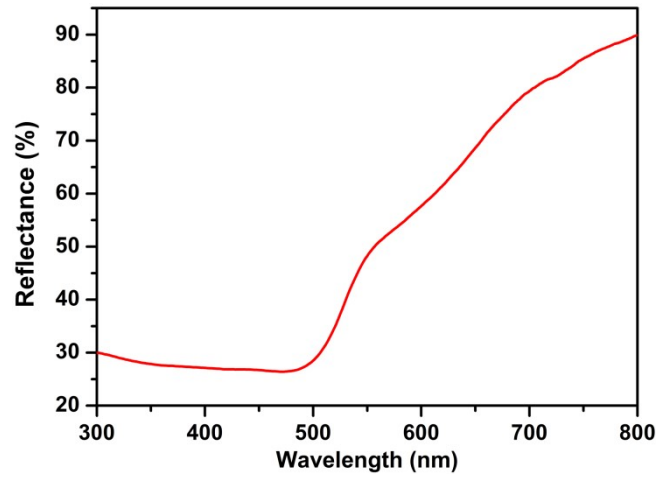

Fig. S6 The UV-Vis diffuse reflectance spectrum of compound 1.

### 2d). Photocatalysis

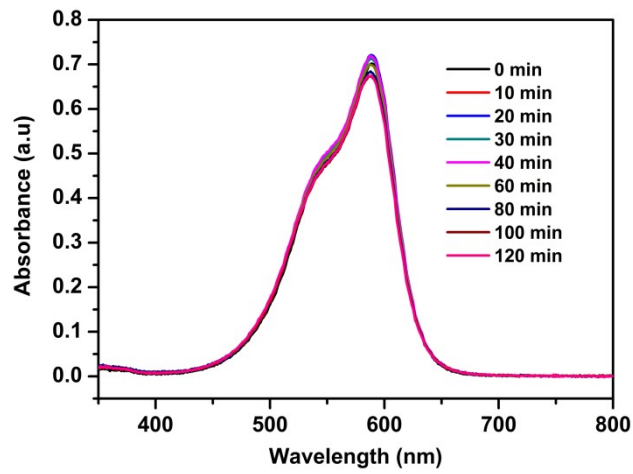

Fig. S7 The blank experiment of compound 1.

### 3. DFT calculations

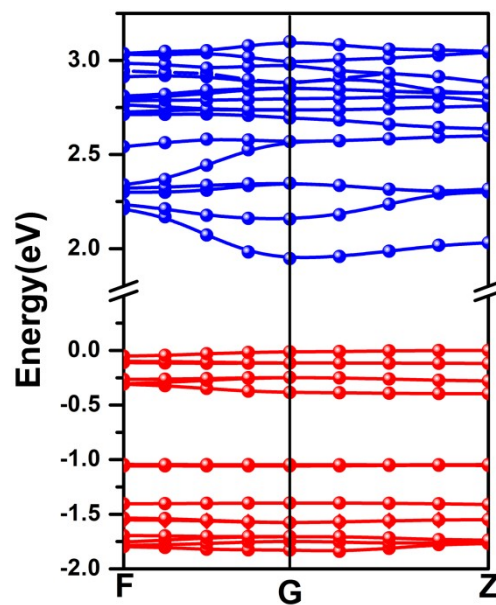

**Fig. S8** The band structure of compound **1**. The VB maximum is set at 0 eV (dashed line).
